# Supplementary material for: Chemical Composition in Juvenile and Mature Wood of Branch and Main Trunk of Leucaena leucocephala (Lam.) de Wit
Source: MDPI journal article supplement (doi:10.3390/plants12233977), 2023-11-26
Supplement: s1 [file s1]

Table S1. Band assignments of wood powder (WP) and Klason lignin (KL) from juvenile and mature wood of branch and main trunk of *Leucaena leucocephala*

| No. | Wave number (cm <sup>-1</sup> ) |       |            |       |             |       |            |       | Band origin,<br>short comments<br>references                                         |
|-----|---------------------------------|-------|------------|-------|-------------|-------|------------|-------|--------------------------------------------------------------------------------------|
|     | Juvenile wood                   |       |            |       | Mature wood |       |            |       |                                                                                      |
|     | Branch                          |       | Main trunk |       | Branch      |       | Main trunk |       |                                                                                      |
|     | WP                              | KL    | WP         | KL    | WP          | KL    | WP         | KL    |                                                                                      |
| 1   | 3410                            | ----  | 3413       | ----  | 3419        | ----  | 3412       | ----  | O-H Stretching vibration [16]                                                        |
| 2   | 2906                            | ----  | 2922       | ----  | 2922        | ----  | 2922       | ----  | C-H stretching vibration [16]                                                        |
| 3   | 1738                            | 1721  | 1738       | 1715  | 1739        | 1721  | 1739       | 1718  | C=O Stretching vibration [16,17]                                                     |
| 4   | 1639                            | 1627  | 1628       | 1629  | 1634        | 1629  | 1639       | 1629  | C=O stretching vibration in lignin [17]                                              |
| 5   | 1599                            | ----  | 1599       | ----  | 1599        | 1542  | 1601       | 1541  | Aromatic skelton vibration plus C=O stretch;<br>S>G; G condensed > G etherified [16] |
| 6   | 1510                            | 1506  | 1510       | 1506  | 1509        | 1509  | 1510       | 1505  | Aromatic skelton vibration, Benzene<br>ring stretch in lignin(G>S) [17]              |
| 7   | 1461                            | 1461  | 1461       | 1461  | 1462        | 1459  | 1461       | 1461  | C-H Deformation vibration [16,17]                                                    |
| 8   | 1425                            | 1417  | 1424       | 1421  | 1425        | 1407  | 1424       | 1422  | CH <sub>2</sub> scissor vibration and CH <sub>3</sub> bending<br>vibration [16,17]   |
| 9   | 1375                            | ----- | 1374       | ----- | 1375        | ----- | 1375       | ----- | CH <sub>3</sub> bending [17]                                                         |
| 10  | 1329                            | 1323  | 1322       | 1322  | 1327        | ----- | 1322       | 1322  | S-ring + G-ring condensed in lignin [16]                                             |
| 11  | 1247                            | 1285  | 1248       | 1284  | 1249        | 1282  | 1248       | 1285  | CH <sub>3</sub> COOR acetic ester<br>(Upward direction) [16]                         |
| 12  | 1161                            | 1175  | 1159       | 1177  | 1160        | 1172  | 1160       | 1177  | C-O-C antisymmetric bridge stretching<br>vibration [16, 17]                          |
| 13  | 1111                            | ----- | 1111       | ----- | 1113        | ----- | 1111       | ----- | O-H association band [16]                                                            |
| 14  | 1056                            | 1069  | 1056       | 1069  | 1055        | 1058  | 1055       | 1069  | C=O stretching [17]                                                                  |
| 15  | 1035                            | 1010  | 1035       | 1010  | 1035        | 1026  | 1035       | 1010  | aromatic C-H in plane deformation G>S plus<br>C=O stretch [16]                       |
| 16  | 897                             | 885   | 886        | 885   | 898         | 882   | 885        | 885   | Anomeric carbon group frequency [17]                                                 |
